# Supplementary material
Source: MDPI journal article supplement (https://www.mdpi.com/2227-9040/11/10/542)
Supplement: s1 [file s1]

Supplementary Material

# Solid-Phase Microextraction (SPME) and Gas Chromatographic/Mass Spectrometry in Chronic Obstructive Pulmonary Disease (COPD): A Chemometric Approach

Loukia Lypirou <sup>1</sup>, Christos Chronis <sup>2</sup>, Konstantinos Exarchos <sup>2</sup>, Konstantinos Kostikas <sup>2</sup> and Vasilios Sakkas <sup>1,\*</sup>

<sup>1</sup> Chemistry Department, University of Ioannina, Ioannina, 45510, Greece; loukialpr@gmail.com

<sup>2</sup> Respiratory Medicine Department, School of Medicine, University of Ioannina, Ioannina, 45510, Greece; krapsi@hotmail.com (C.C.); kexarcho@gmail.com (K.E.); ktkostikas@uoi.gr (K.K.)

\* Correspondence: [vsakkas@uoi.gr](mailto:vsakkas@uoi.gr); Tel.: +30-26510-08303

(A)

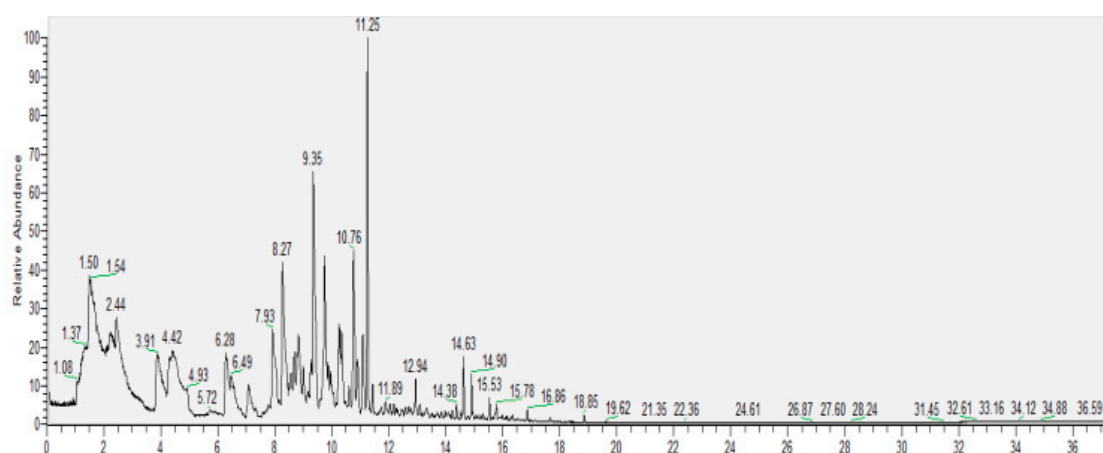

(B)

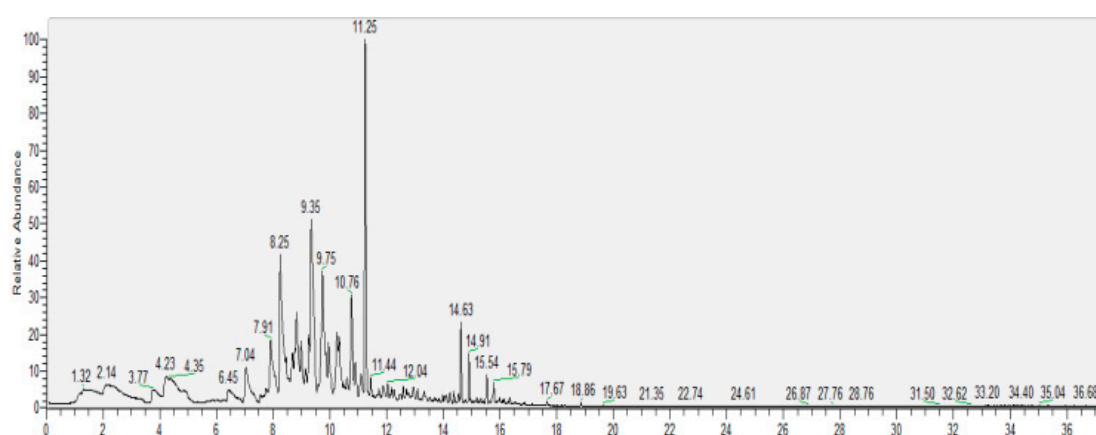

**Figure S1.** A typical SPME/GC-MS chromatogram of an exhaled breath sample of patient (A) with exacerbations and (B) without exacerbations.
